# Supplementary material for: Potential of needle trap microextraction – portable gas chromatography – mass spectrometry for measurement of atmospheric volatile compounds
Source: Copernicus journal article supplement (doi:10.5194/amt-2016-71), 2016-04-12
Supplement: Supplementary file 1 [file amt-2016-71-supplement.pdf]

# Supplemental material for “Potential of needle trap microextraction – portable gas chromatography – mass spectrometry for measurement of atmospheric volatile compounds”

L. M. F. Barreira<sup>1</sup>, Y. Xue<sup>1</sup>, G. Duporté<sup>1</sup>, J. Parshintsev<sup>1</sup>, K. Hartonen<sup>1</sup>, M. Jussila<sup>1</sup>, M. Kulmala<sup>2</sup>, M.-L. Riekkola<sup>1</sup>

<sup>1</sup>Laboratory of Analytical Chemistry, Department of Chemistry, University of Helsinki, P.O. Box 55, FI-00014 Helsinki, Finland

<sup>2</sup>Division of Atmospheric Sciences, Department of Physics, University of Helsinki, P.O. Box 64, FI-00014 Helsinki, Finland

Correspondence to: M.-L. Riekkola (marja-liisa.riekkola@helsinki.fi)

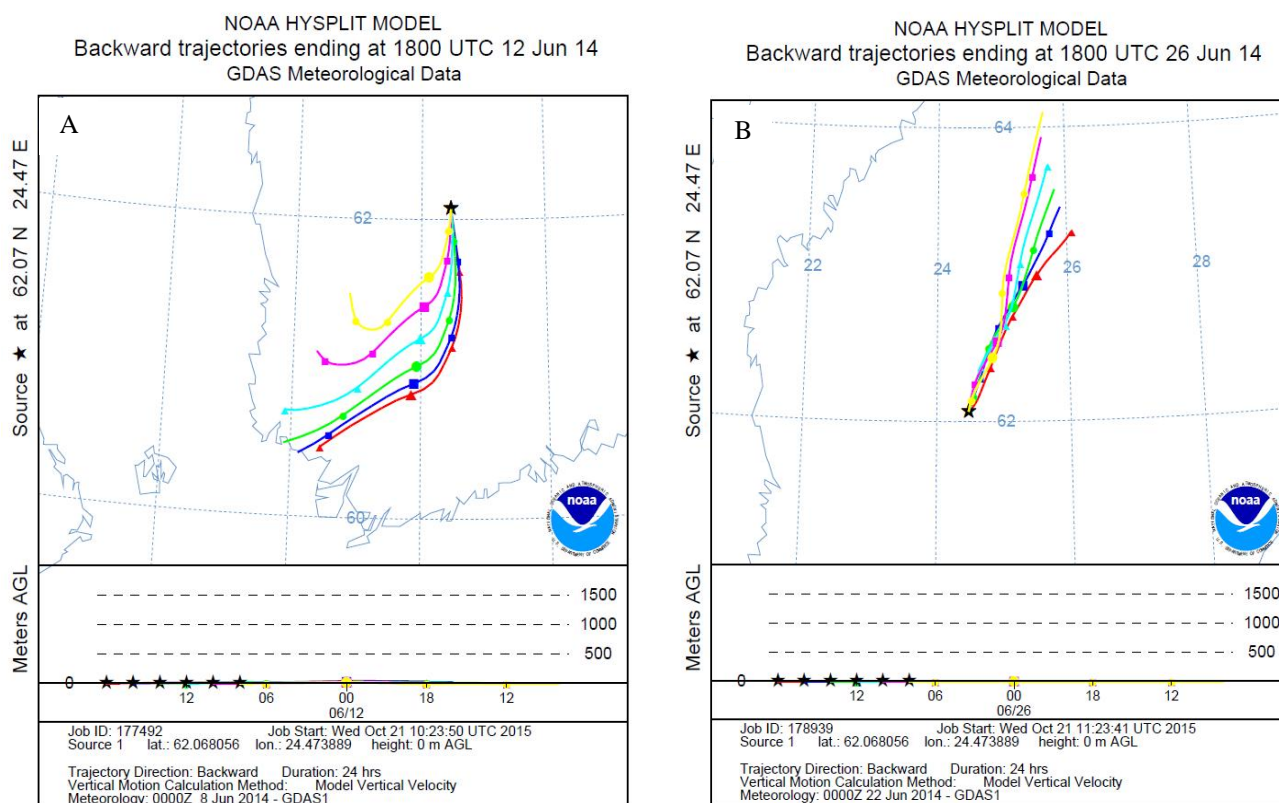

10

Figure S1: Back trajectories observed during the sampling period, on 12<sup>th</sup> (A) and 26<sup>th</sup> (B) of June, 2014.

**Table S1: Peak area / Vcollected [mL<sup>-1</sup>] obtained for the identified monoterpenes, pinonaldehyde, ethylbenzene and p/m-xylene during the summer campaign, 2014.**

| date      | sampling time | Volume [mL] | $\alpha$ -pinene | $\Delta^3$ -carene | pinonaldehyde | ethylbenzene | p/m-xylene | temperature (4.2m) [°C] | particle number concentration [# /cm <sup>3</sup> ] |
|-----------|---------------|-------------|------------------|--------------------|---------------|--------------|------------|-------------------------|-----------------------------------------------------|
| 12.6.2014 | 9:29-11:09    | 2513        | n.d.             | n.d.               | n.d.          | 0.132        | 0.674      | 13                      | 1825                                                |
| 12.6.2014 | 11:11-12:48   | 2446        | 0.131            | 0.034              | n.d.          | 0.173        | 0.584      | 13                      | 1788                                                |
| 12.6.2014 | 12:49-14:27   | 2456        | 0.030            | n.d.               | n.d.          | 0.075        | 0.391      | 12                      | 1902                                                |
| 12.6.2014 | 14:29-16:19   | 2750        | 0.080            | 0.106              | n.d.          | 0.153        | 0.785      | 11                      | 1433                                                |
| 12.6.2014 | 16:20-17:51   | 2286        | 0.413            | 0.122              | n.d.          | 0.141        | 0.872      | 11                      | 1245                                                |
| 13.6.2014 | 9:23-11:07    | 2613        | 0.216            | 0.016              | n.d.          | 0.551        | 2.560      | 11                      | 905                                                 |
| 13.6.2014 | 11:08-12:48   | 2473        | n.d.             | n.d.               | n.d.          | 0.125        | 0.822      | 12                      | 1014                                                |
| 13.6.2014 | 12:49-14:30   | 2526        | 0.207            | 0.026              | n.d.          | 0.079        | 0.576      | 14                      | 1055                                                |
| 13.6.2014 | 14:32-16:07   | 2397        | 0.140            | n.d.               | n.d.          | 0.112        | 0.827      | 15                      | 1099                                                |
| 13.6.2014 | 16:08-17:44   | 2404        | 0.026            | 0.007              | n.d.          | 0.072        | 0.580      | 13                      | 1067                                                |
| 14.6.2014 | 9:21-11:04    | 2599        | 0.086            | n.d.               | n.d.          | 0.173        | 0.965      | 9                       | 566                                                 |
| 14.6.2014 | 11:05-12:43   | 2457        | 0.096            | n.d.               | n.d.          | 0.304        | 1.417      | 11                      | 1006                                                |
| 14.6.2014 | 12:44-14:27   | 2569        | n.d.             | n.d.               | n.d.          | 0.134        | 0.886      | 12                      | 1121                                                |
| 14.6.2014 | 14:28-16:03   | 2358        | n.d.             | n.d.               | n.d.          | 0.053        | 0.598      | 12                      | 1501                                                |
| 14.6.2014 | 16:04-17:46   | 2573        | 0.011            | n.d.               | n.d.          | 0.133        | 0.897      | 12                      | 1640                                                |
| 15.6.2014 | 9:00-10:37    | 2446        | n.d.             | n.d.               | n.d.          | 0.089        | 0.856      | 14                      | 2609                                                |
| 15.6.2014 | 10:38-12:15   | 2396        | n.d.             | n.d.               | n.d.          | 0.028        | 0.378      | 16                      | 2082                                                |
| 15.6.2014 | 12:16-14:02   | 2654        | 0.006            | n.d.               | n.d.          | 0.108        | 0.686      | 17                      | 2261                                                |
| 15.6.2014 | 14:02-15:39   | 2402        | n.d.             | n.d.               | n.d.          | 0.014        | 0.298      | 16                      | 2265                                                |
| 15.6.2014 | 15:40-17:24   | 2624        | n.d.             | n.d.               | n.d.          | 0.004        | 0.174      | 17                      | 2072                                                |
| 16.6.2014 | 8:55-10:35    | 2502        | 0.164            | 0.023              | n.d.          | 0.269        | 1.129      | 11                      | 2225                                                |
| 16.6.2014 | 10:36-12:14   | 2471        | n.d.             | n.d.               | n.d.          | 0.041        | 0.468      | 10                      | 2060                                                |
| 16.6.2014 | 12:15-13:59   | 2593        | 0.034            | n.d.               | n.d.          | n.d.         | 0.171      | 9                       | 1341                                                |
| 16.6.2014 | 14:00-15:39   | 2461        | 0.046            | n.d.               | n.d.          | 0.012        | 0.267      | 9                       | 1932                                                |
| 16.6.2014 | 15:40-17:19   | 2492        | 0.042            | n.d.               | n.d.          | n.d.         | 0.108      | 8                       | 3176                                                |
| 17.6.2014 | 8:56-10:32    | 2427        | n.d.             | n.d.               | n.d.          | 0.007        | 0.287      | 5                       | 4883                                                |
| 17.6.2014 | 10:33-12:18   | 2634        | n.d.             | n.d.               | n.d.          | 0.013        | 0.215      | 7                       | 8375                                                |
| 17.6.2014 | 12:19-13:59   | 2504        | n.d.             | n.d.               | n.d.          | n.d.         | 0.070      | 7                       | 13259                                               |
| 17.6.2014 | 14:00-15:39   | 2464        | n.d.             | n.d.               | n.d.          | n.d.         | 0.108      | 7                       | 14454                                               |
| 17.6.2014 | 15:40-17:21   | 2549        | n.d.             | n.d.               | n.d.          | n.d.         | 0.190      | 9                       | 14179                                               |
| 18.6.2014 | 8:48-10:28    | 2500        | 0.003            | 0.023              | n.d.          | 0.024        | 0.406      | 11                      | 1657                                                |
| 18.6.2014 | 10:29-12:08   | 2479        | n.d.             | n.d.               | n.d.          | 0.016        | 0.276      | 12                      | 2394                                                |

**Table S1: Peak area / Vcollected [mL<sup>-1</sup>] obtained for the identified monoterpenes, pinonaldehyde, ethylbenzene and p/m-xylene during the summer campaign, 2014. (cont.)**

| date      | sampling time | Volume [mL] | $\alpha$ -pinene | $\Delta^3$ -carene | pinonaldehyde | ethylbenzene | p/m-xylene | temperature (4.2m) [°C] | particle number concentration [# /cm <sup>3</sup> ] |
|-----------|---------------|-------------|------------------|--------------------|---------------|--------------|------------|-------------------------|-----------------------------------------------------|
| 18.6.2014 | 12:09-13:53   | 2585        | n.d.             | n.d.               | n.d.          | 0.030        | 0.361      | 13                      | 3676                                                |
| 18.6.2014 | 13:54-15:33   | 2478        | n.d.             | n.d.               | n.d.          | 0.004        | 0.169      | 14                      | 6108                                                |
| 18.6.2014 | 15:34-17:24   | 2792        | n.d.             | n.d.               | n.d.          | 0.005        | 0.191      | 14                      | 4764                                                |
| 24.6.2014 | 8:46-10:24    | 2453        | 0.015            | 0.063              | 0.002         | 0.131        | 1.095      | 14                      | 1336                                                |
| 24.6.2014 | 10:25-12:21   | 2901        | 0.413            | 0.124              | 0.002         | 0.048        | 0.427      | 13                      | 1932                                                |
| 24.6.2014 | 12:22-14:09   | 2638        | 0.201            | 0.039              | 0.012         | 0.096        | 0.503      | 16                      | 2722                                                |
| 24.6.2014 | 14:10-15:51   | 2501        | n.d.             | n.d.               | 0.016         | 0.009        | 0.244      | 13                      | 1302                                                |
| 24.6.2014 | 15:52-17:41   | 2695        | 0.274            | 0.076              | n.d.          | n.d.         | 0.137      | 13                      | 1890                                                |
| 25.6.2014 | 8:45-10:26    | 2525        | 0.100            | 0.004              | n.d.          | 0.011        | 0.352      | 11                      | 1591                                                |
| 25.6.2014 | 10:27-12:07   | 2502        | n.d.             | 0.005              | n.d.          | n.d.         | 0.140      | 11                      | 1193                                                |
| 25.6.2014 | 12:08-13:55   | 2656        | n.d.             | n.d.               | n.d.          | 0.001        | 0.117      | 12                      | 993                                                 |
| 25.6.2014 | 13:56-15:38   | 2552        | 0.005            | n.d.               | n.d.          | n.d.         | 0.127      | 13                      | 991                                                 |
| 25.6.2014 | 15:39-17:38   | 2971        | n.d.             | n.d.               | n.d.          | n.d.         | 0.036      | 13                      | 765                                                 |
| 26.6.2014 | 8:45-10:36    | 2777        | n.d.             | n.d.               | n.d.          | n.d.         | 0.071      | 13                      | 3505                                                |
| 26.6.2014 | 10:37-12:22   | 2620        | n.d.             | n.d.               | n.d.          | n.d.         | 0.034      | 13                      | 3108                                                |
| 26.6.2014 | 12:23-14:07   | 2589        | n.d.             | n.d.               | n.d.          | n.d.         | n.d.       | 15                      | 2585                                                |
| 26.6.2014 | 14:08-15:54   | 2649        | n.d.             | n.d.               | n.d.          | n.d.         | n.d.       | 15                      | 2364                                                |
| 26.6.2014 | 15:55-17:44   | 2743        | n.d.             | n.d.               | n.d.          | n.d.         | 0.009      | 14                      | 2354                                                |
| 27.6.2014 | 8:46-10:28    | 2528        | n.d.             | n.d.               | n.d.          | n.d.         | 0.026      | 14                      | 2081                                                |
| 27.6.2014 | 10:29-12:09   | 2507        | n.d.             | n.d.               | n.d.          | n.d.         | n.d.       | 15                      | 2144                                                |
| 27.6.2014 | 12:10-14:07   | 2910        | n.d.             | n.d.               | n.d.          | n.d.         | 0.036      | 15                      | 2113                                                |
| 27.6.2014 | 14:08-15:49   | 2515        | n.d.             | n.d.               | n.d.          | n.d.         | 0.008      | 14                      | 2162                                                |
| 27.6.2014 | 15:50-17:42   | 2792        | n.d.             | n.d.               | n.d.          | n.d.         | 0.009      | 14                      | 2049                                                |
| 28.6.2014 | 8:52-10:37    | 2617        | n.d.             | n.d.               | n.d.          | n.d.         | 0.067      | 14                      | 2509                                                |
| 28.6.2014 | 10:38-12:28   | 2735        | n.d.             | n.d.               | n.d.          | n.d.         | 0.011      | 16                      | 2766                                                |
| 28.6.2014 | 12:29-14:09   | 2487        | n.d.             | n.d.               | n.d.          | n.d.         | n.d.       | 16                      | 3402                                                |
| 28.6.2014 | 14:10-15:50   | 2508        | n.d.             | n.d.               | n.d.          | n.d.         | 0.010      | 17                      | 1936                                                |
| 28.6.2014 | 15:51-17:37   | 2665        | n.d.             | n.d.               | n.d.          | n.d.         | n.d.       | 17                      | 3043                                                |
| 29.6.2014 | 9:04-10:41    | 2412        | 0.025            | n.d.               | n.d.          | n.d.         | 0.058      | 15                      | 2127                                                |
| 29.6.2014 | 10:42-12:43   | 2995        | 0.028            | n.d.               | n.d.          | n.d.         | 0.027      | 13                      | 1590                                                |
| 29.6.2014 | 12:44-14:19   | 2390        | n.d.             | n.d.               | n.d.          | n.d.         | 0.009      | 13                      | 1131                                                |
| 29.6.2014 | 14:20-16:30   | 3247        | 0.025            | n.d.               | n.d.          | n.d.         | n.d.       | 13                      | 859                                                 |

**Table S1: Peak area / Vcollected [mL<sup>-1</sup>] obtained for the identified monoterpenes, pinonaldehyde, ethylbenzene and p/m-xylene during the summer campaign, 2014. (cont.)**

| date      | sampling time | Volume [mL] | $\alpha$ -pinene | $\Delta^3$ -carene | pinonaldehyde | ethylbenzene | p/m-xylene | temperature (4.2m) [°C] | particle number concentration [# /cm <sup>3</sup> ] |
|-----------|---------------|-------------|------------------|--------------------|---------------|--------------|------------|-------------------------|-----------------------------------------------------|
| 29.6.2014 | 16:31-18:21   | 2765        | n.d.             | n.d.               | n.d.          | n.d.         | n.d.       | 10                      | 931                                                 |
| 30.6.2014 | 8:41-10:18    | 2417        | 0.031            | 0.014              | n.d.          | n.d.         | 0.012      | 11                      | 838                                                 |
| 30.6.2014 | 10:19-11:57   | 2432        | 0.047            | 0.006              | n.d.          | n.d.         | n.d.       | 11                      | 750                                                 |
| 30.6.2014 | 11:58-13:40   | 2560        | 0.034            | n.d.               | n.d.          | n.d.         | 0.005      | 12                      | 729                                                 |
| 30.6.2014 | 13:41-15:18   | 2378        | n.d.             | n.d.               | n.d.          | n.d.         | n.d.       | 12                      | 650                                                 |
| 30.6.2014 | 15:19-16:55   | 2379        | 0.032            | n.d.               | n.d.          | n.d.         | n.d.       | 12                      | 536                                                 |
| 1.7.2014  | 8:57-10:35    | 2446        | 0.038            | n.d.               | n.d.          | n.d.         | 0.038      | 14                      | 811                                                 |
| 1.7.2014  | 10:36-12:12   | 2390        | n.d.             | n.d.               | n.d.          | n.d.         | n.d.       | 14                      | 675                                                 |
| 1.7.2014  | 12:13-13:51   | 2458        | 0.031            | n.d.               | n.d.          | n.d.         | n.d.       | 15                      | 594                                                 |
| 2.7.2014  | 8:55-10:37    | 2560        | 0.171            | 0.215              | n.d.          | n.d.         | 0.068      | 11                      | 591                                                 |
| 2.7.2014  | 10:40-12:22   | 2561        | n.d.             | 0.093              | n.d.          | n.d.         | 0.009      | 12                      | 769                                                 |
| 2.7.2014  | 12:25-14:05   | 2510        | 0.060            | 0.058              | n.d.          | n.d.         | n.d.       | 12                      | 649                                                 |
| 2.7.2014  | 14:07-15:47   | 2514        | 0.045            | 0.014              | n.d.          | n.d.         | 0.007      | 11                      | 736                                                 |
| 2.7.2014  | 15:49-17:29   | 2507        | n.d.             | n.d.               | n.d.          | n.d.         | n.d.       | 10                      | 905                                                 |
| 3.7.2014  | 9:07-10:47    | 2506        | 0.065            | n.d.               | n.d.          | n.d.         | n.d.       | 16                      | 2572                                                |
| 3.7.2014  | 10:48-12:28   | 2503        | 0.112            | 0.004              | n.d.          | n.d.         | n.d.       | 18                      | 2811                                                |
| 3.7.2014  | 12:30-14:10   | 2502        | n.d.             | n.d.               | n.d.          | n.d.         | n.d.       | 20                      | 1882                                                |
| 3.7.2014  | 14:11-15:51   | 2500        | 0.016            | n.d.               | n.d.          | n.d.         | n.d.       | 20                      | 3556                                                |
| 3.7.2014  | 15:52-17:32   | 2503        | 0.033            | n.d.               | n.d.          | n.d.         | n.d.       | 19                      | 1941                                                |
| 4.7.2014  | 10:06-11:46   | 2502        | 0.083            | 0.008              | n.d.          | n.d.         | n.d.       | 16                      | 1007                                                |
| 4.7.2014  | 11:47-13:27   | 2523        | 0.027            | n.d.               | n.d.          | n.d.         | n.d.       | 18                      | 1085                                                |
| 4.7.2014  | 13:29-15:09   | 2500        | n.d.             | n.d.               | n.d.          | n.d.         | n.d.       | 20                      | 1213                                                |
| 4.7.2014  | 15:10-16:50   | 2501        | 0.023            | n.d.               | n.d.          | n.d.         | n.d.       | 19                      | 2246                                                |
| 5.7.2014  | 8:04-9:46     | 2566        | 0.409            | 0.114              | n.d.          | n.d.         | n.d.       | 15                      | 1962                                                |
| 5.7.2014  | 9:48-11:28    | 2000        | n.d.             | n.d.               | 0.003         | n.d.         | n.d.       | 17                      | 1468                                                |
| 5.7.2014  | 11:30-13:10   | 2519        | n.d.             | n.d.               | n.d.          | n.d.         | n.d.       | 19                      | 1588                                                |
| 5.7.2014  | 13:13-14:58   | 2631        | 0.048            | n.d.               | 0.004         | n.d.         | n.d.       | 21                      | 2989                                                |
| 5.7.2014  | 14:59-16:40   | 2537        | n.d.             | n.d.               | n.d.          | n.d.         | n.d.       | 22                      | 3063                                                |
| 6.7.2014  | 9:14-10:54    | 2528        | 0.116            | 0.014              | 0.002         | n.d.         | n.d.       | 21                      | 1413                                                |
| 6.7.2014  | 10:55-12:35   | 2502        | 0.075            | n.d.               | 0.004         | n.d.         | n.d.       | 22                      | 1678                                                |
| 6.7.2014  | 12:36-14:20   | 2615        | 0.008            | n.d.               | n.d.          | n.d.         | n.d.       | 23                      | 1862                                                |
| 6.7.2014  | 14:22-16:01   | 2496        | 0.055            | n.d.               | n.d.          | n.d.         | n.d.       | 22                      | 2165                                                |

**Table S1: Peak area / Vcollected [mL<sup>-1</sup>] obtained for the identified monoterpenes, pinonaldehyde, ethylbenzene and p/m-xylene during the summer campaign, 2014. (cont.)**

| date      | sampling time | Volume [mL] | $\alpha$ -pinene | $\Delta^3$ -carene | pinonaldehyde | ethylbenzene | p/m-xylene | temperature (4.2m) [°C] | particle number concentration [# /cm <sup>3</sup> ] |
|-----------|---------------|-------------|------------------|--------------------|---------------|--------------|------------|-------------------------|-----------------------------------------------------|
| 6.7.2014  | 16:02-17:42   | 2517        | 0.202            | 0.061              | 0.013         | n.d.         | n.d.       | 23                      | 1587                                                |
| 7.7.2014  | 8:40-10:00    | 2000        | 0.030            | 0.024              | 0.002         | n.d.         | n.d.       | 22                      | 2906                                                |
| 7.7.2014  | 10:01-11:41   | 2500        | 0.035            | n.d.               | 0.003         | n.d.         | n.d.       | 23                      | 2554                                                |
| 7.7.2014  | 11:41-13:22   | 2542        | 0.052            | 0.003              | 0.004         | n.d.         | n.d.       | 24                      | 2255                                                |
| 7.7.2014  | 13:24-15:04   | 2500        | n.d.             | n.d.               | n.d.          | n.d.         | n.d.       | 24                      | 2054                                                |
| 7.7.2014  | 15:05-16:45   | 2500        | 0.019            | 0.004              | n.d.          | n.d.         | n.d.       | 24                      | 2605                                                |
| 8.7.2014  | 8:42-10:25    | 2595        | 1.140            | 0.485              | 0.020         | n.d.         | n.d.       | 23                      | 2966                                                |
| 8.7.2014  | 10:26-12:06   | 2500        | 0.003            | n.d.               | 0.003         | n.d.         | n.d.       | 24                      | 2527                                                |
| 8.7.2014  | 12:08-13:47   | 2500        | 1.019            | 0.344              | 0.013         | n.d.         | n.d.       | 24                      | 2207                                                |
| 8.7.2014  | 13:48-15:28   | 2514        | 0.052            | 0.013              | 0.016         | n.d.         | n.d.       | 26                      | 1871                                                |
| 8.7.2014  | 15:29-17:09   | 2501        | 0.008            | n.d.               | n.d.          | n.d.         | n.d.       | 26                      | 1554                                                |
| 9.7.2014  | 8:28-10:09    | 2548        | 0.124            | 0.058              | 0.003         | n.d.         | n.d.       | 24                      | 1182                                                |
| 9.7.2014  | 10:40-12:20   | 2507        | 0.137            | 0.045              | 0.002         | n.d.         | n.d.       | 25                      | 1189                                                |
| 9.7.2014  | 12:44-14:24   | 2501        | 0.077            | 0.009              | n.d.          | n.d.         | n.d.       | 26                      | 1247                                                |
| 9.7.2014  | 14:47-16:27   | 2502        | 1.047            | 0.309              | 0.003         | n.d.         | n.d.       | 25                      | 1229                                                |
| 9.7.2014  | 16:51-18:31   | 2500        | 0.180            | 0.064              | 0.010         | n.d.         | n.d.       | 27                      | 1200                                                |
| 10.7.2014 | 8:34-10:14    | 2500        | 0.020            | 0.080              | n.d.          | n.d.         | n.d.       | 16                      | 1146                                                |
| 10.7.2014 | 10:40-12:20   | 2508        | 0.285            | 0.098              | n.d.          | n.d.         | n.d.       | 15                      | 1207                                                |
| 10.7.2014 | 12:43-14:23   | 2524        | 0.032            | n.d.               | n.d.          | n.d.         | n.d.       | 18                      | 1482                                                |
| 10.7.2014 | 14:45-16:25   | 2500        | n.d.             | n.d.               | n.d.          | n.d.         | n.d.       | 19                      | 5270                                                |
| 10.7.2014 | 16:47-18:27   | 2500        | n.d.             | n.d.               | n.d.          | n.d.         | n.d.       | 19                      | 5696                                                |

**Table S2: Peak area / Vcollected [mL<sup>-1</sup>] obtained for the identified aldehydes during the summer campaign, 2014.**

| date      | sampling time | Volume [mL] | hexanal | benzaldehyde | heptanal | octanal | nonanal | decanal | temperature (4.2m) [°C] | particle number concentration [# /cm <sup>3</sup> ] |
|-----------|---------------|-------------|---------|--------------|----------|---------|---------|---------|-------------------------|-----------------------------------------------------|
| 12.6.2014 | 9:29-11:09    | 2513        | n.d.    | 0.193        | 0.005    | 0.060   | 0.437   | 0.057   | 13                      | 1825                                                |
| 12.6.2014 | 11:11-12:48   | 2446        | n.d.    | 0.093        | n.d.     | 0.024   | 0.250   | 0.055   | 13                      | 1788                                                |
| 12.6.2014 | 12:49-14:27   | 2456        | 0.013   | 0.063        | 0.005    | 0.051   | 0.210   | 0.007   | 12                      | 1902                                                |
| 12.6.2014 | 14:29-16:19   | 2750        | n.d.    | 0.353        | 0.042    | 0.171   | 1.024   | 0.569   | 11                      | 1433                                                |
| 12.6.2014 | 16:20-17:51   | 2286        | 0.007   | 0.360        | 0.010    | 0.110   | 0.801   | 0.354   | 11                      | 1245                                                |
| 13.6.2014 | 9:23-11:07    | 2613        | 0.103   | 0.882        | 0.051    | 0.149   | 0.761   | 0.207   | 11                      | 905                                                 |
| 13.6.2014 | 11:08-12:48   | 2473        | 0.024   | 0.465        | 0.028    | 0.154   | 0.656   | 0.147   | 12                      | 1014                                                |
| 13.6.2014 | 12:49-14:30   | 2526        | n.d.    | 0.184        | n.d.     | 0.009   | 0.351   | 0.081   | 14                      | 1055                                                |
| 13.6.2014 | 14:32-16:07   | 2397        | 0.008   | 0.289        | 0.007    | 0.096   | 0.556   | 0.043   | 15                      | 1099                                                |
| 13.6.2014 | 16:08-17:44   | 2404        | 0.013   | 0.266        | 0.010    | 0.045   | 0.332   | 0.023   | 13                      | 1067                                                |
| 14.6.2014 | 9:21-11:04    | 2599        | n.d.    | 0.239        | n.d.     | 0.042   | 0.410   | 0.105   | 9                       | 566                                                 |
| 14.6.2014 | 11:05-12:43   | 2457        | 0.059   | 0.549        | 0.017    | 0.102   | 0.634   | 0.067   | 11                      | 1006                                                |
| 14.6.2014 | 12:44-14:27   | 2569        | 0.079   | 0.487        | 0.059    | 0.120   | 0.538   | n.d.    | 12                      | 1121                                                |
| 14.6.2014 | 14:28-16:03   | 2358        | 0.019   | 0.216        | 0.011    | 0.082   | 0.480   | 0.094   | 12                      | 1501                                                |
| 14.6.2014 | 16:04-17:46   | 2573        | 0.042   | 0.414        | 0.025    | 0.112   | 0.505   | 0.024   | 12                      | 1640                                                |
| 15.6.2014 | 9:00-10:37    | 2446        | 0.068   | 0.357        | 0.029    | 0.167   | 0.303   | 0.043   | 14                      | 2609                                                |
| 15.6.2014 | 10:38-12:15   | 2396        | 0.009   | 0.188        | n.d.     | 0.075   | 0.329   | 0.016   | 16                      | 2082                                                |
| 15.6.2014 | 12:16-14:02   | 2654        | 0.046   | 0.329        | 0.010    | 0.096   | 0.113   | 0.018   | 17                      | 2261                                                |
| 15.6.2014 | 14:02-15:39   | 2402        | 0.010   | 0.155        | 0.013    | 0.098   | 0.316   | 0.019   | 16                      | 2265                                                |
| 15.6.2014 | 15:40-17:24   | 2624        | n.d.    | 0.108        | n.d.     | 0.045   | 0.254   | 0.014   | 17                      | 2072                                                |
| 16.6.2014 | 8:55-10:35    | 2502        | 0.054   | 0.336        | 0.003    | 0.084   | 0.292   | 0.029   | 11                      | 2225                                                |
| 16.6.2014 | 10:36-12:14   | 2471        | 0.031   | 0.255        | 0.017    | 0.072   | 0.270   | 0.032   | 10                      | 2060                                                |
| 16.6.2014 | 12:15-13:59   | 2593        | n.d.    | 0.075        | n.d.     | 0.005   | 0.154   | 0.057   | 9                       | 1341                                                |
| 16.6.2014 | 14:00-15:39   | 2461        | 0.007   | 0.135        | n.d.     | 0.038   | 0.274   | 0.007   | 9                       | 1932                                                |
| 16.6.2014 | 15:40-17:19   | 2492        | n.d.    | 0.035        | n.d.     | 0.019   | 0.164   | 0.083   | 8                       | 3176                                                |
| 17.6.2014 | 8:56-10:32    | 2427        | n.d.    | 0.049        | n.d.     | 0.003   | 0.139   | 0.077   | 5                       | 4883                                                |
| 17.6.2014 | 10:33-12:18   | 2634        | n.d.    | 0.068        | n.d.     | 0.011   | 0.229   | 0.055   | 7                       | 8375                                                |
| 17.6.2014 | 12:19-13:59   | 2504        | 0.011   | 0.032        | 0.003    | 0.038   | 0.221   | 0.044   | 7                       | 13259                                               |
| 17.6.2014 | 14:00-15:39   | 2464        | n.d.    | 0.044        | n.d.     | 0.013   | 0.220   | 0.064   | 7                       | 14454                                               |
| 17.6.2014 | 15:40-17:21   | 2549        | n.d.    | 0.082        | n.d.     | 0.010   | 0.222   | 0.026   | 9                       | 14179                                               |
| 18.6.2014 | 8:48-10:28    | 2500        | n.d.    | 0.193        | 0.016    | 0.105   | 0.311   | 0.029   | 11                      | 1657                                                |
| 18.6.2014 | 10:29-12:08   | 2479        | n.d.    | 0.165        | 0.006    | 0.028   | 0.271   | 0.026   | 12                      | 2394                                                |

**Table S2: Peak area / Vcollected [mL<sup>-1</sup>] obtained for the identified aldehydes during the summer campaign, 2014. (cont.)**

| date      | sampling time | Volume [mL] | hexanal | benzaldehyde | heptanal | octanal | nonanal | decanal | temperature (4.2m) [°C] | particle number concentration [# /cm <sup>3</sup> ] |
|-----------|---------------|-------------|---------|--------------|----------|---------|---------|---------|-------------------------|-----------------------------------------------------|
| 18.6.2014 | 12:09-13:53   | 2585        | 0.018   | 0.244        | 0.005    | 0.073   | 0.270   | 0.008   | 13                      | 3676                                                |
| 18.6.2014 | 13:54-15:33   | 2478        | 0.046   | 0.138        | 0.018    | 0.078   | 0.222   | 0.017   | 14                      | 6108                                                |
| 18.6.2014 | 15:34-17:24   | 2792        | n.d.    | 0.105        | 0.004    | 0.080   | 0.257   | 0.036   | 14                      | 4764                                                |
| 24.6.2014 | 8:46-10:24    | 2453        | 0.164   | 0.976        | 0.147    | 0.452   | 1.264   | 0.648   | 14                      | 1336                                                |
| 24.6.2014 | 10:25-12:21   | 2901        | 0.016   | 0.336        | 0.010    | 0.096   | 0.525   | 0.205   | 13                      | 1932                                                |
| 24.6.2014 | 12:22-14:09   | 2638        | 0.060   | 0.561        | 0.069    | 0.162   | 0.354   | n.d.    | 16                      | 2722                                                |
| 24.6.2014 | 14:10-15:51   | 2501        | 0.018   | 0.492        | 0.062    | 0.200   | 0.465   | 0.033   | 13                      | 1302                                                |
| 24.6.2014 | 15:52-17:41   | 2695        | n.d.    | 0.188        | 0.006    | 0.043   | 0.310   | 0.046   | 13                      | 1890                                                |
| 25.6.2014 | 8:45-10:26    | 2525        | 0.031   | 0.336        | 0.030    | 0.112   | 0.514   | 0.079   | 11                      | 1591                                                |
| 25.6.2014 | 10:27-12:07   | 2502        | 0.014   | 0.275        | 0.031    | 0.136   | 0.419   | 0.026   | 11                      | 1193                                                |
| 25.6.2014 | 12:08-13:55   | 2656        | 0.015   | 0.241        | 0.011    | 0.092   | 0.343   | 0.032   | 12                      | 993                                                 |
| 25.6.2014 | 13:56-15:38   | 2552        | 0.006   | 0.152        | 0.013    | 0.074   | 0.224   | 0.024   | 13                      | 991                                                 |
| 25.6.2014 | 15:39-17:38   | 2971        | 0.014   | 0.099        | 0.005    | 0.060   | 0.130   | n.d.    | 13                      | 765                                                 |
| 26.6.2014 | 8:45-10:36    | 2777        | n.d.    | 0.070        | n.d.     | 0.044   | 0.069   | 0.006   | 13                      | 3505                                                |
| 26.6.2014 | 10:37-12:22   | 2620        | n.d.    | 0.086        | n.d.     | 0.027   | 0.084   | 0.003   | 13                      | 3108                                                |
| 26.6.2014 | 12:23-14:07   | 2589        | n.d.    | 0.029        | 0.004    | 0.037   | 0.093   | n.d.    | 15                      | 2585                                                |
| 26.6.2014 | 14:08-15:54   | 2649        | n.d.    | 0.039        | n.d.     | 0.013   | 0.087   | n.d.    | 15                      | 2364                                                |
| 26.6.2014 | 15:55-17:44   | 2743        | n.d.    | 0.074        | n.d.     | 0.026   | 0.077   | n.d.    | 14                      | 2354                                                |
| 27.6.2014 | 8:46-10:28    | 2528        | n.d.    | 0.069        | 0.007    | 0.054   | 0.130   | 0.004   | 14                      | 2081                                                |
| 27.6.2014 | 10:29-12:09   | 2507        | n.d.    | 0.028        | n.d.     | 0.017   | 0.125   | 0.016   | 15                      | 2144                                                |
| 27.6.2014 | 12:10-14:07   | 2910        | n.d.    | 0.113        | n.d.     | 0.041   | 0.096   | n.d.    | 15                      | 2113                                                |
| 27.6.2014 | 14:08-15:49   | 2515        | 0.004   | 0.094        | 0.010    | 0.057   | 0.112   | 0.009   | 14                      | 2162                                                |
| 27.6.2014 | 15:50-17:42   | 2792        | n.d.    | 0.092        | n.d.     | 0.033   | 0.079   | 0.007   | 14                      | 2049                                                |
| 28.6.2014 | 8:52-10:37    | 2617        | n.d.    | 0.097        | n.d.     | 0.029   | 0.122   | 0.008   | 14                      | 2509                                                |
| 28.6.2014 | 10:38-12:28   | 2735        | 0.010   | 0.054        | 0.004    | 0.056   | 0.100   | n.d.    | 16                      | 2766                                                |
| 28.6.2014 | 12:29-14:09   | 2487        | n.d.    | 0.029        | n.d.     | 0.008   | 0.150   | 0.007   | 16                      | 3402                                                |
| 28.6.2014 | 14:10-15:50   | 2508        | n.d.    | 0.053        | n.d.     | 0.032   | 0.080   | 0.008   | 17                      | 1936                                                |
| 28.6.2014 | 15:51-17:37   | 2665        | 0.008   | 0.047        | 0.006    | 0.052   | 0.072   | n.d.    | 17                      | 3043                                                |
| 29.6.2014 | 9:04-10:41    | 2412        | 0.003   | 0.137        | n.d.     | 0.048   | 0.144   | 0.005   | 15                      | 2127                                                |
| 29.6.2014 | 10:42-12:43   | 2995        | n.d.    | 0.134        | 0.006    | 0.060   | 0.085   | 0.005   | 13                      | 1590                                                |
| 29.6.2014 | 12:44-14:19   | 2390        | 0.004   | 0.085        | 0.018    | 0.080   | 0.113   | 0.011   | 13                      | 1131                                                |
| 29.6.2014 | 14:20-16:30   | 3247        | n.d.    | 0.086        | n.d.     | 0.015   | 0.117   | n.d.    | 13                      | 859                                                 |

**Table S2: Peak area / Vcollected [mL<sup>-1</sup>] obtained for the identified aldehydes during the summer campaign, 2014. (cont.)**

| date      | sampling time | Volume [mL] | hexanal | benzaldehyde | heptanal | octanal | nonanal | decanal | temperature (4.2m) [°C] | particle number concentration [# /cm <sup>3</sup> ] |
|-----------|---------------|-------------|---------|--------------|----------|---------|---------|---------|-------------------------|-----------------------------------------------------|
| 29.6.2014 | 16:31-18:21   | 2765        | n.d.    | 0.096        | 0.003    | 0.036   | 0.102   | n.d.    | 10                      | 931                                                 |
| 30.6.2014 | 8:41-10:18    | 2417        | 0.002   | 0.027        | n.d.     | 0.033   | 0.170   | 0.055   | 11                      | 838                                                 |
| 30.6.2014 | 10:19-11:57   | 2432        | n.d.    | 0.023        | n.d.     | 0.004   | 0.120   | 0.043   | 11                      | 750                                                 |
| 30.6.2014 | 11:58-13:40   | 2560        | n.d.    | 0.076        | 0.002    | 0.026   | 0.135   | 0.007   | 12                      | 729                                                 |
| 30.6.2014 | 13:41-15:18   | 2378        | n.d.    | 0.062        | n.d.     | 0.038   | 0.155   | 0.017   | 12                      | 650                                                 |
| 30.6.2014 | 15:19-16:55   | 2379        | n.d.    | 0.025        | n.d.     | n.d.    | 0.083   | 0.034   | 12                      | 536                                                 |
| 1.7.2014  | 8:57-10:35    | 2446        | n.d.    | 0.141        | 0.004    | 0.073   | 0.143   | 0.012   | 14                      | 811                                                 |
| 1.7.2014  | 10:36-12:12   | 2390        | n.d.    | 0.104        | 0.007    | 0.077   | 0.128   | 0.012   | 14                      | 675                                                 |
| 1.7.2014  | 12:13-13:51   | 2458        | n.d.    | 0.108        | n.d.     | 0.025   | 0.152   | 0.006   | 15                      | 594                                                 |
| 2.7.2014  | 8:55-10:37    | 2560        | n.d.    | 0.049        | n.d.     | 0.052   | 0.251   | 0.037   | 11                      | 591                                                 |
| 2.7.2014  | 10:40-12:22   | 2561        | n.d.    | 0.077        | n.d.     | 0.083   | 0.216   | 0.016   | 12                      | 769                                                 |
| 2.7.2014  | 12:25-14:05   | 2510        | n.d.    | 0.022        | n.d.     | 0.001   | 0.164   | 0.042   | 12                      | 649                                                 |
| 2.7.2014  | 14:07-15:47   | 2514        | 0.001   | 0.065        | n.d.     | 0.049   | 0.215   | 0.015   | 11                      | 736                                                 |
| 2.7.2014  | 15:49-17:29   | 2507        | n.d.    | 0.028        | 0.003    | 0.038   | 0.219   | 0.020   | 10                      | 905                                                 |
| 3.7.2014  | 9:07-10:47    | 2506        | n.d.    | 0.078        | n.d.     | n.d.    | 0.180   | 0.067   | 16                      | 2572                                                |
| 3.7.2014  | 10:48-12:28   | 2503        | 0.002   | 0.099        | 0.009    | 0.040   | 0.256   | 0.011   | 18                      | 2811                                                |
| 3.7.2014  | 12:30-14:10   | 2502        | 0.003   | 0.063        | 0.023    | 0.032   | 0.242   | 0.019   | 20                      | 1882                                                |
| 3.7.2014  | 14:11-15:51   | 2500        | 0.016   | 0.106        | 0.010    | 0.071   | 0.375   | 0.030   | 20                      | 3556                                                |
| 3.7.2014  | 15:52-17:32   | 2503        | n.d.    | 0.089        | n.d.     | 0.004   | 0.129   | 0.009   | 19                      | 1941                                                |
| 4.7.2014  | 10:06-11:46   | 2502        | 0.004   | 0.059        | n.d.     | n.d.    | 0.125   | 0.038   | 16                      | 1007                                                |
| 4.7.2014  | 11:47-13:27   | 2523        | 0.011   | 0.108        | 0.017    | 0.012   | 0.187   | 0.016   | 18                      | 1085                                                |
| 4.7.2014  | 13:29-15:09   | 2500        | n.d.    | 0.049        | n.d.     | 0.009   | 0.159   | 0.017   | 20                      | 1213                                                |
| 4.7.2014  | 15:10-16:50   | 2501        | n.d.    | 0.069        | n.d.     | n.d.    | 0.139   | 0.044   | 19                      | 2246                                                |
| 5.7.2014  | 8:04-9:46     | 2566        | n.d.    | 0.118        | 0.004    | n.d.    | 0.167   | 0.075   | 15                      | 1962                                                |
| 5.7.2014  | 9:48-11:28    | 2000        | 0.010   | 0.189        | 0.019    | 0.049   | 0.348   | 0.125   | 17                      | 1468                                                |
| 5.7.2014  | 11:30-13:10   | 2519        | n.d.    | 0.064        | n.d.     | 0.015   | 0.275   | 0.150   | 19                      | 1588                                                |
| 5.7.2014  | 13:13-14:58   | 2631        | 0.020   | 0.116        | 0.005    | 0.025   | 0.350   | 0.145   | 21                      | 2989                                                |
| 5.7.2014  | 14:59-16:40   | 2537        | 0.016   | 0.058        | 0.007    | 0.012   | 0.283   | 0.111   | 22                      | 3063                                                |
| 6.7.2014  | 9:14-10:54    | 2528        | 0.022   | 0.211        | 0.009    | 0.018   | 0.321   | 0.095   | 21                      | 1413                                                |
| 6.7.2014  | 10:55-12:35   | 2502        | 0.012   | 0.111        | 0.008    | 0.025   | 0.329   | 0.162   | 22                      | 1678                                                |
| 6.7.2014  | 12:36-14:20   | 2615        | 0.028   | 0.079        | 0.010    | 0.048   | 0.324   | 0.140   | 23                      | 1862                                                |
| 6.7.2014  | 14:22-16:01   | 2496        | n.d.    | 0.036        | n.d.     | 0.002   | 0.220   | 0.129   | 22                      | 2165                                                |



**Table S2: Peak area / Vcollected [mL<sup>-1</sup>] obtained for the identified aldehydes during the summer campaign, 2014. (cont.)**

| date      | sampling time | Volume [mL] | hexanal | benzaldehyde | heptanal | octanal | nonanal | decanal | temperature (4.2m) [°C] | particle number concentration [# /cm <sup>3</sup> ] |
|-----------|---------------|-------------|---------|--------------|----------|---------|---------|---------|-------------------------|-----------------------------------------------------|
| 6.7.2014  | 16:02-17:42   | 2517        | 0.014   | 0.076        | 0.003    | n.d.    | 0.243   | 0.125   | 23                      | 1587                                                |
| 7.7.2014  | 8:40-10:00    | 2000        | 0.023   | 0.228        | 0.035    | 0.058   | 0.488   | 0.164   | 22                      | 2906                                                |
| 7.7.2014  | 10:01-11:41   | 2500        | n.d.    | 0.063        | n.d.     | n.d.    | 0.223   | 0.125   | 23                      | 2554                                                |
| 7.7.2014  | 11:41-13:22   | 2542        | 0.018   | 0.105        | 0.006    | 0.008   | 0.277   | 0.093   | 24                      | 2255                                                |
| 7.7.2014  | 13:24-15:04   | 2500        | 0.010   | 0.079        | 0.007    | 0.028   | 0.264   | 0.108   | 24                      | 2054                                                |
| 7.7.2014  | 15:05-16:45   | 2500        | n.d.    | 0.035        | n.d.     | n.d.    | 0.165   | 0.096   | 24                      | 2605                                                |
| 8.7.2014  | 8:42-10:25    | 2595        | 0.029   | 0.153        | 0.002    | 0.012   | 0.256   | 0.109   | 23                      | 2966                                                |
| 8.7.2014  | 10:26-12:06   | 2500        | 0.018   | 0.140        | 0.006    | 0.040   | 0.334   | 0.109   | 24                      | 2527                                                |
| 8.7.2014  | 12:08-13:47   | 2500        | n.d.    | 0.091        | n.d.     | n.d.    | 0.163   | 0.082   | 24                      | 2207                                                |
| 8.7.2014  | 13:48-15:28   | 2514        | 0.003   | 0.072        | n.d.     | n.d.    | 0.239   | 0.099   | 26                      | 1871                                                |
| 8.7.2014  | 15:29-17:09   | 2501        | n.d.    | 0.059        | 0.003    | 0.026   | 0.252   | 0.103   | 26                      | 1554                                                |
| 9.7.2014  | 8:28-10:09    | 2548        | 0.027   | 0.099        | 0.008    | 0.028   | 0.379   | 0.107   | 24                      | 1182                                                |
| 9.7.2014  | 10:40-12:20   | 2507        | 0.024   | 0.147        | 0.003    | 0.036   | 0.345   | 0.078   | 25                      | 1189                                                |
| 9.7.2014  | 12:44-14:24   | 2501        | 0.010   | 0.093        | 0.020    | 0.063   | 0.291   | 0.118   | 26                      | 1247                                                |
| 9.7.2014  | 14:47-16:27   | 2502        | 0.009   | 0.146        | 0.010    | 0.019   | 0.262   | 0.088   | 25                      | 1229                                                |
| 9.7.2014  | 16:51-18:31   | 2500        | 0.004   | 0.067        | 0.004    | 0.015   | 0.273   | 0.058   | 27                      | 1200                                                |
| 10.7.2014 | 8:34-10:14    | 2500        | n.d.    | 0.055        | n.d.     | n.d.    | 0.178   | 0.031   | 16                      | 1146                                                |
| 10.7.2014 | 10:40-12:20   | 2508        | n.d.    | 0.005        | n.d.     | n.d.    | 0.044   | 0.004   | 15                      | 1207                                                |
| 10.7.2014 | 12:43-14:23   | 2524        | 0.002   | 0.040        | n.d.     | n.d.    | 0.110   | 0.047   | 18                      | 1482                                                |
| 10.7.2014 | 14:45-16:25   | 2500        | 0.001   | 0.021        | n.d.     | n.d.    | 0.143   | 0.077   | 19                      | 5270                                                |
| 10.7.2014 | 16:47-18:27   | 2500        | n.d.    | n.d.         | n.d.     | n.d.    | 0.071   | 0.019   | 19                      | 5696                                                |

**Table S3: Correlation coefficients between all measured aldehydes during the summer campaign.**

| compound             | pinonaldehyde | hexanal | benzaldehyde | heptanal | octanal | nonanal | decanal |
|----------------------|---------------|---------|--------------|----------|---------|---------|---------|
| <i>pinonaldehyde</i> | 1             | 0.11    | 0.12         | 0.17     | 0.02    | 0.09    | 0.12    |
| <i>hexanal</i>       | 0.11          | 1       | 0.84         | 0.81     | 0.75    | 0.64    | 0.44    |
| <i>benzaldehyde</i>  | 0.12          | 0.84    | 1            | 0.83     | 0.84    | 0.81    | 0.50    |
| <i>heptanal</i>      | 0.17          | 0.81    | 0.83         | 1        | 0.88    | 0.72    | 0.55    |
| <i>octanal</i>       | 0.02          | 0.75    | 0.84         | 0.88     | 1       | 0.75    | 0.51    |
| <i>nonanal</i>       | 0.09          | 0.64    | 0.81         | 0.72     | 0.75    | 1       | 0.79    |
| <i>decanal</i>       | 0.12          | 0.44    | 0.50         | 0.55     | 0.51    | 0.79    | 1       |
